# Supplementary material
Source: publisher figshare collection journal article supplement (https://acs.figshare.com/ndownloader/files/5214895)
Supplement: Supplementary file 1 [file 5214895]

## SUPPORTING INFORMATION

**Table S1. Mutant Fet3p-supported  $^{59}\text{Fe}$ -Uptake**

| Fet3p species | $\text{Fe}^{59}$ Uptake (% of WT) |               |
|---------------|-----------------------------------|---------------|
|               | 0 mM Citrate                      | 20 mM Citrate |
| WT            | 100                               | 100           |
| D283A         | 100                               | 3             |
| E185A         | 0                                 | 0             |
| D409A         | 100                               | 7             |
| E185A/D409A   | 0                                 | 0             |

Iron uptake phenotypes for each mutant were examined for citrate sensitivity relative to yeast expressing the wild type ferroxidase by monitoring cellular  $^{59}\text{Fe}$  incorporation. All of the mutant enzymes were present at the yeast plasma membrane as viewed by the positive localization of a partner Ftr1:GFP fusion.

**FIGURE S1**

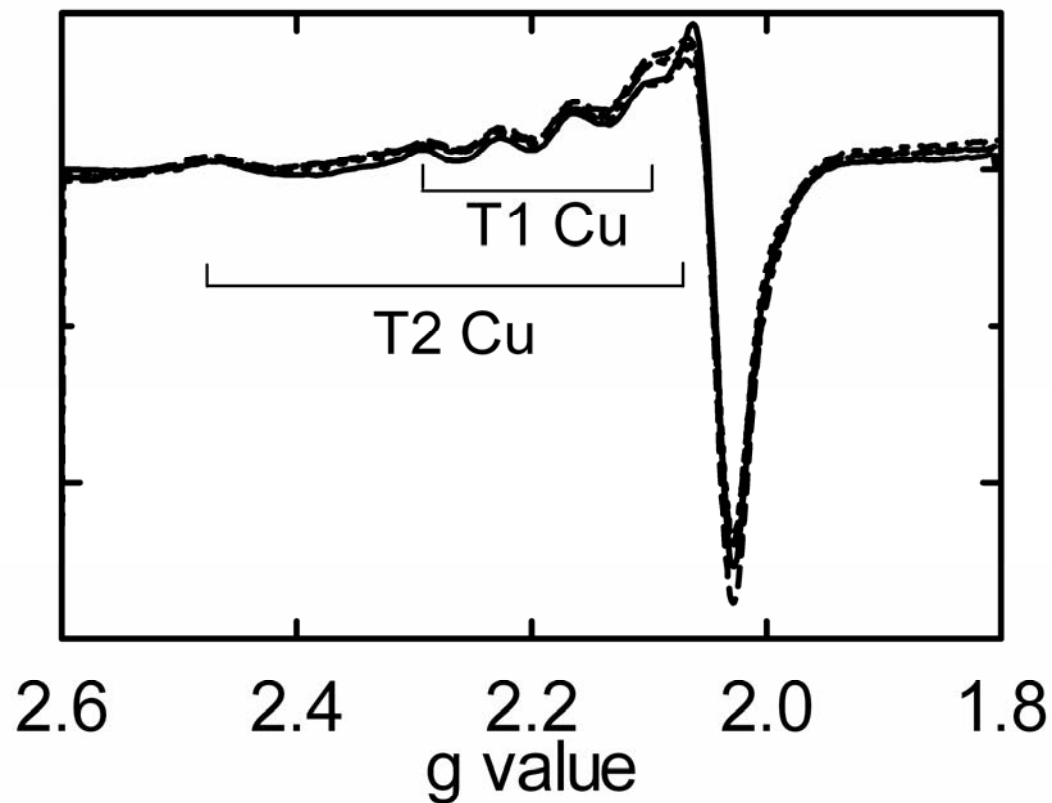

**FIGURE S1. EPR spectra of Fet3 wild-type and mutant proteins.** EPR spectra at 77 K for Fet3p WT (—), E185A (---), D283A (•••), D409A (-•-), E185A/D409A (••-). The  $^{63/65}\text{Cu}$  splitting in  $g_{\parallel}$  is indicated for the T1 and T2  $\text{Cu}^{\text{II}}$  sites. EPR spectra were recorded under the following conditions: 9.41 GHz microwave frequency, 10 mW microwave power, 20 G modulation amplitude, 100 kHz modulation frequency, 327 ms time constant. At least 6 scans were averaged to obtain the spectra presented.
